# Supplementary material for: Altered Gut Microbial Profile Accompanied by Abnormal Fatty Acid Metabolism Activity Exacerbates Endometrial Cancer Progression
Source: PubMed Central journal article supplement (PMC9769730; doi:10.1128/spectrum.02612-22), 2022-10-13
Supplement: spectrum.02612-22-s0002.pdf [file spectrum.02612-22-s0002.pdf]

Supplementary Table 1 Characteristics of study participants

| Characteristic           | EC (n=18)  | Control (n=18) |
|--------------------------|------------|----------------|
| Age, year(mean±SD)       | 54.94±9.7  | 47.47±6.88     |
| Body-mass index(mean±SD) | 28.05±5.31 | 25.24±3.97     |
| Normal (BMI<25)          | 6          | 6              |
| Overweight (BMI≥25)      | 12         | 12             |
| Histologic subtype       |            |                |
| Endometrioid             | 15         | -              |
| Serous                   | 2          | -              |
| Carcinosarcoma           | 1          | -              |
| Hysteromyoma             | -          | 2              |
| Adenomyosis              | -          | 5              |
| CIN                      | -          | 4              |
| Endometrial polyp        | -          | 1              |
| EIN                      | -          | 6              |
| FIGO stage               |            |                |
| IA                       | 9          | -              |
| IB                       | 3          | -              |
| II                       | 1          | -              |
| III                      | 5          | -              |
| IIIA                     | 2          | -              |
| IIIB                     | 0          | -              |
| IIIC1                    | 0          | -              |
| IIIC2                    | 3          | -              |
| IV                       | 0          | -              |
| Diabetes (%)             |            |                |
| Yes                      | 5 (27.8%)  | 1 (5.6%)       |
| No                       | 13(72.2%)  | 17(94.4%)      |
| Hypertension (%)         |            |                |
| Yes                      | 6 (33.3%)  | 1 (5.6%)       |

---

|                    |           |           |
|--------------------|-----------|-----------|
| No                 | 12(66.7%) | 17(94.4%) |
| Postmenopausal (%) |           |           |
| Yes                | 10(55.6%) | 3 (16.7%) |
| No                 | 8 (44.4%) | 15(83.3%) |

---
